# Supplementary material
Source: Springer Nature journal article supplement (https://www.springermedizin.de/resource/supplementary/12885_2010_2289_MOESM10_ESM.pdf/9460948)

A

EGF & HRG *k*-means clustering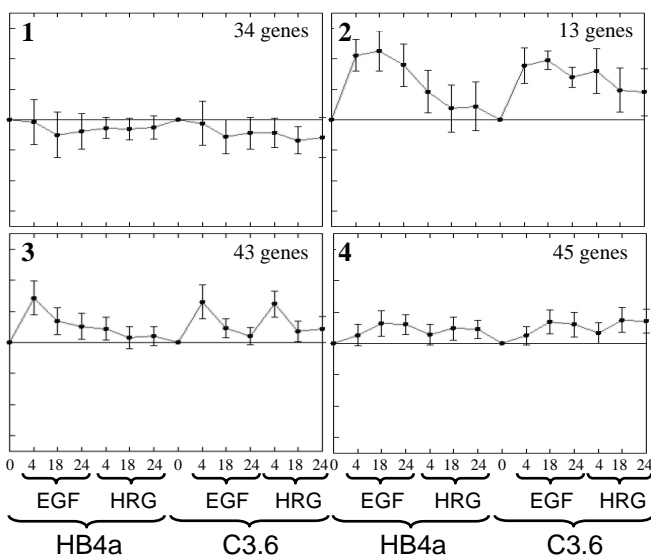

B

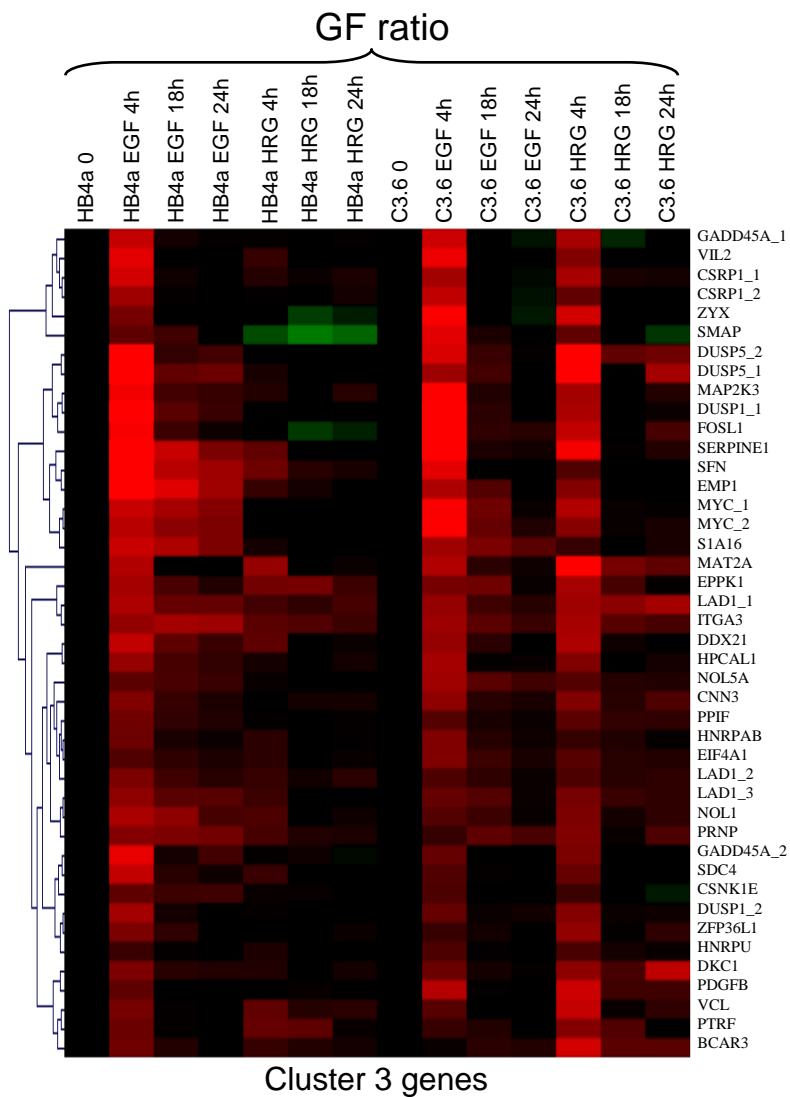

Supplement: MOESM10 [file 9460948]
